# Supplementary material
Source: Springer Nature journal article supplement (https://www.springermedizin.de/resource/supplementary/13058_2010_9449_MOESM1_ESM.pdf/9702202)

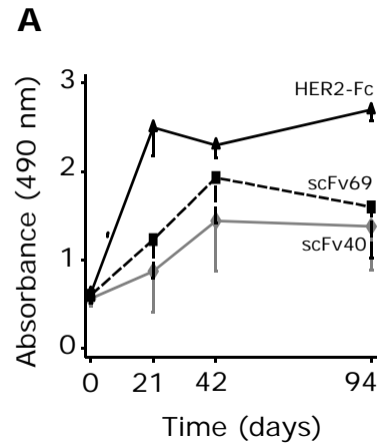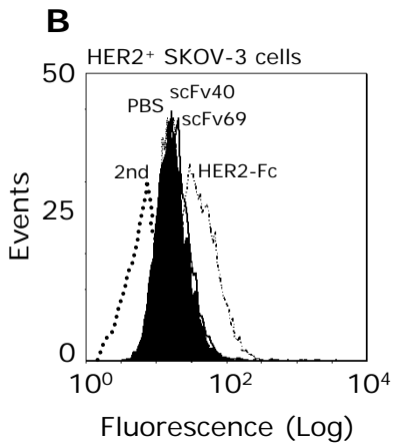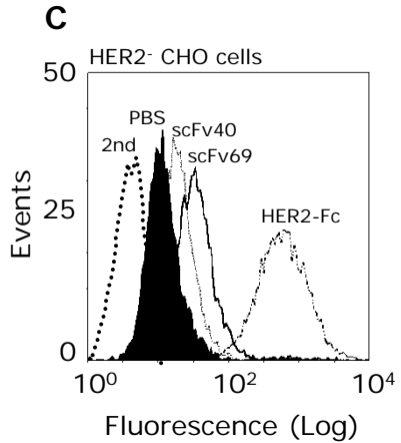

Supplement: MOESM1 [file 9702202]
